## **Grassland irrigation and fertilisation alter vegetation height and vegetation within temperature and negatively affect orthopteran populations**

Jean-Yves Humbert<sup>a,\*</sup>, Sarah Delley<sup>a</sup> and Raphaël Arlettaz<sup>a</sup>

<sup>a</sup> Division of Conservation Biology, Institute of Ecology and Evolution, University of Bern,  
Baltzerstrasse 6, 3012 Bern, Switzerland

\*Corresponding author:

Jean-Yves Humbert

Institute of Ecology and Evolution

Baltzerstrasse 6

CH-3012 Bern

Tel: +41 (0)31 631 31 73

Fax: +41 (0)31 631 48 88

E-mail: [jean-yves.humbert@iee.unibe.ch](mailto:jean-yves.humbert@iee.unibe.ch)

Bern, 17 January 2020

1 **Abstract**

2 European mountain meadows are hosting an exceptionally rich biodiversity. While they have  
3 long been exposed to land abandonment, they are nowadays additionally threatened by  
4 agriculture intensification through aerial irrigation and slurry application. The consequences  
5 of this intensification on arthropods are not well documented and studies are needed to fulfil  
6 this knowledge gap. Six experimental management treatments combining a full factorial  
7 design and a gradual level of fertilisation and irrigation were implemented in 2010 in twelve  
8 different montane and subalpine Swiss meadows. In 2013, orthopterans were sampled to  
9 assess the influence of the management practices on their population. In addition changes in  
10 vegetation height and temperature induced by intensification were recorded in order to better  
11 appraise underlying mechanisms. Intensification had a negative impact on Caelifera  
12 (grasshoppers); with decreases of up to 70% in densities and 50% in species richness in the  
13 most intensively managed treatment plots. In parallel intensification induced an increase in  
14 mean vegetation height and a cooling of up to 4.2 °C (10 cm aboveground) within most  
15 intensively managed plots. These microhabitat and microclimate changes are likely to have  
16 affected Caelifera development, in particular thermophilous species. In contrast, Ensifera  
17 (bush crickets) densities and species richness did not respond to the management treatments.  
18 The use of irrigation (without fertilisation) had limited impacts on orthopterans and  
19 microclimate. In conclusion, orthopterans, in particular Caelifera, are relatively sensitive to  
20 grassland intensification and to conserve the full community, mountain agricultural systems  
21 need to maintain extensively managed meadows.

22 **Keyword:** agriculture, Alps, arthropods, conservation, grasshoppers, meadow

## 23 **1. Introduction**

24 In Europe, mountain meadows represent one of last remnant of exceptionally diverse semi-  
25 natural grassland types (Veen et al., 2009). However two new management practices are  
26 spreading in alpine regions and threaten these biodiversity rich habitats: irrigation with  
27 sprinkler and fertilisation with liquid manure (Maurer et al., 2006; Riedener et al., 2013).  
28 Both of these practices modify the vegetation community and structure which in turn affects  
29 the arthropod populations (Andrey et al., 2014; Schwab et al., 2002). Arthropods play an  
30 important role in grassland systems and beyond; they provide or at least participate in a range  
31 of ecosystem services such as pollination, decomposition process or pest control (e.g. Sutter  
32 and Albrecht, 2016) and are primordial food items for many vertebrates (e.g. Arlettaz, 1996;  
33 Wilson et al., 1999). This underlines the importance to preserve their abundance and  
34 diversity. So far fertilisation has been shown to have a negative impact on arthropod species  
35 richness ensuing from a reduction of vegetation diversity (Haddad et al., 2009; Haddad et al.,  
36 2000). On the other hand it seems to boost herbivore abundances through an increase in plant  
37 tissue nitrogen and to have cascading effect on other arthropods functional groups (Andrey et  
38 al., 2016; Haddad et al., 2001; Hudewenz et al., 2012). In contrast the effects of irrigation on  
39 arthropods remain poorly documented. Therefore current knowledge does not allow  
40 determining the irrigation and fertilisation thresholds that should not be exceeded in order to  
41 maintain a functional and diverse arthropod community in mountain meadows (but see  
42 Andrey et al., 2016; Lessard-Therrien et al., 2018).

43 The goal of the present study was to assess the response of orthopteran species  
44 richness and density to gradual levels of fertilisation and irrigation in montane and subalpine  
45 meadows. In these grasslands, orthopterans represent the most important insect group in term  
46 of biomass (Blumer and Diemer, 1996). They are a key component of the diet of many  
47 insectivorous species and an important decline in their density would have cascading effect on

48 higher trophic level (Britschgi et al., 2006; Vickery et al., 2001). In addition, orthopterans are  
49 recognized bioindicators for grasslands as they readily respond to management changes (Buri  
50 et al., 2013) and are sensitive to a set of vegetation parameters (Le Provost et al., 2017). First,  
51 orthopterans are sensitive to microclimate (Löffler and Fartmann, 2017) which varies with  
52 vegetation height and density (Song et al., 2013). As ectotherms organisms, their development  
53 rate, body size, reproductive success and other physiological processes are depending on  
54 temperature. Each species has its own thermal sensitivity: for example eurythermal species  
55 such as *Pseudochorthippus parallelus* are very tolerant and can adapt to a range of  
56 microclimatic conditions while thermophilous species such as *Stenobothrus lineatus* are  
57 restricted to warm and dry habitats (van Wingerden et al., 1991; Willott and Hassall, 1998).  
58 Microclimatic conditions influence thus the orthopteran community. Second, the habitat  
59 diversity hypothesis stipulates that more diverse a habitat is the more species it is likely to  
60 host (Báldi, 2008). At an orthopteran scale microhabitat diversity is function of the vegetation  
61 structural heterogeneity which is to some extent correlated with plant diversity (e.g. Morris,  
62 2000; Woodcock et al., 2009) and vegetation height (Andrey et al., 2014). Finally food  
63 availability is a limiting factor for the expansion of any organism. A sufficient proportion of  
64 grass is essential to maintain Caelifera (grasshoppers) density as they almost exclusively feed  
65 on it (Ibanez et al., 2013). Ensifera (bush crickets) on their side have a more diversified diet  
66 composed of small invertebrates and grasses and are thus less dependent on specific food  
67 resources (Baur et al., 2006). The first aim of the present study was to investigate how  
68 orthopteran populations respond to gradual level of irrigation and fertilisation and to  
69 determine whether an optimum management intensity maximising both density and species  
70 richness exists. The second aim was to measure the changes in vegetation height and  
71 aboveground temperatures induced by intensification, and to determine whether orthopteran  
72 responses can be explained by these changes.

73           In the short term fertilisation has been shown to increase vegetation structure and  
74 phytomass production (Andrey et al., 2014) while in the long term it induces a loss of plant  
75 species richness and a homogenisation of the vegetation cover (e.g. Lessard-Therrien et al.,  
76 2017; Marini et al., 2008; Socher et al., 2013). In addition it usually induces a shift in plant  
77 community toward higher percentage of grass and legumes (Rudmann-Maurer et al., 2008;  
78 Socher et al., 2013) whereas irrigation favours grass species and increase nitrogen (N)  
79 mineralization by plants (Jeangros and Bertola, 2000; Riedener et al., 2013). Finally both  
80 inputs boost the productivity and thus create a denser and taller sward (Bassin et al., 2012;  
81 Marini et al., 2009). Consequently we expected aboveground temperature to gradually cool  
82 down along the intensification gradient (Song et al., 2013). We expected orthopteran densities  
83 to increase at mid-intensity as a consequence of better food quality (Hudewenz et al., 2012;  
84 Joern et al., 2012) and to decrease in highly intensified plots due to the detrimental effect of  
85 microclimate cooling (van Wingerden et al., 1992). Concerning orthopterans species richness,  
86 we expected it to decrease steadily along the intensification gradient due to the disappearance  
87 of thermophilous species and the loss of microhabitats (Fournier et al., 2017; van Wingerden  
88 et al., 1991).

89

## 90 **2. Material and methods**

### 91 *2.1 Study sites*

92 The study was carried out in the canton of Valais, an inner Alps valley of Switzerland which  
93 experiences a continental climate with cold and wet winter and dry and hot summers: mean  
94 annual temperature amounts 10.7°C and mean annual precipitation achieves 517 mm (2000–  
95 2014 mean in Sion, 482 m a.s.l.). In 2010, twelve extensively managed meadows were  
96 selected within this region; they were situated between 790 and 1740 m a.s.l (Appendix 1).

97

98 *2.2 Experimental design*

99 In 2010, within each meadows (n = 12), six different management treatments were randomly  
100 allocated to plots of 20 m in diameter spaced from each other by at least 5 m. The first plot  
101 served as a control (C). The second and third plots were only irrigated (I) or fertilised (F), and  
102 the fourth to sixth plots were irrigated and fertilised (I+F; Table 1). The exact amount of  
103 fertiliser applied at each site depended on the theoretical maximum hay yield achievable  
104 locally with two harvests per year, calculated using pre-experimental hay yield and site  
105 elevation (for details see Appendix A in Andrey et al., 2016). Accordingly, sites were divided  
106 in three groups; 1, 2 and 3, where I+F 3/3-plots received, respectively, 40, 60 or 80 [kg N·ha-  
107 1·yr-1]. Within group, mid-intensive (F and I+F 2/3) and low-intensive (I+F 1/3) plots,  
108 received respectively two-thirds and one-third of the maximum fertilisation dose. It has been  
109 decided to follow these prescriptions in order to obtain results within realistic agronomical  
110 systems. Fertiliser consisted of organic dried manure NPK pellets (MEOC SA, 1906 Charrat,  
111 Switzerland), and mineral potassium oxide (K<sub>2</sub>O) dissolved in water to reach the equivalent of  
112 standard-farm liquid manure consisting namely of 2.4 kg of usable nitrogen, 2 kg of  
113 phosphate (P<sub>2</sub>O<sub>5</sub>), and 8 kg of potassium oxide (K<sub>2</sub>O) per m<sup>3</sup> of solution. Every year the plots  
114 were fertilised once in early spring and once after the first cut (June or July), each time half of  
115 the annual fertiliser amount was applied (except for the 1/3-plots that were fertilised only  
116 once in spring). Treatments I and I + F were additionally irrigated weekly from mid-May to  
117 end of August, except when heavy rainfall occurred ( $\geq 20$  mm over the previous week).  
118 Irrigation thresholds were chosen on the basis of Calame Calame et al. (1992) experiment.  
119 Accordingly I and I+F 2/3 matched the recommendation for the best profitability of water  
120 input (20 mm/week) while low-intensive (I+F 1/3) and high-intensive (I+F 3/3) management  
121 treatments received respectively half and one and an half of this dose (Table 1).

122

123 *2.3 Orthopterans sampling*

124 Orthopterans were sampled in 2013 with a biocenometer (open trap) made of a net fastened  
125 around a strong circular wire so as to provide a total capture area of 1 m<sup>2</sup> (as described in  
126 Humbert et al., 2012). Two sampling sessions were performed: one shortly before the first cut  
127 (between 12 June and 12 July) and one 4–6 weeks after it (between 13 August and 31  
128 August). The date at which meadows were sampled was function of their elevation. During  
129 both sessions, eight samples were regularly taken per treatment plot. All the individuals  
130 trapped within the biocenometer were caught and identified on site. Adults were identified to  
131 species level while juveniles were classified into suborders (Caelifera or Ensifera). All  
132 samplings were done on sunny days between 10 am and 5 pm.

133

134 *2.4 Vegetation height record*

135 Vegetation height was measured as the average vegetation stratum height in a 10 cm radius  
136 around a meterstick. Eight records were taken per plot during the orthopterans samplings and  
137 averaged to have one value per plot. All the measurements were performed by the same  
138 person.

139

140 *2.5 Temperature record*

141 To record aboveground temperatures I-buttons DS1921G-F Thermochron (Maxim Integrated  
142 Products/Dallas) were used, which are self-sufficient systems measuring and recording  
143 temperature in 0.5 °C increment. In each plot one of those device was randomly placed at 5 m  
144 from the centre, fixed on a stick 10 cm above the ground. I-buttons recorded temperature  
145 hourly from beginning of May to end of August. They were removed shortly before the first  
146 cut and replaced within a few days. The data from the ten days following mowing event were  
147 removed from the analysis to reduce noise due to the manipulation of the devices. Average

148 daily temperature was calculated as the mean temperature between 12 am and 4 pm while  
149 average nocturnal temperature was calculated as the mean temperature between 12 pm and 4  
150 am.

151

## 152 *2.6 Statistical analyses*

153 Treatments effects were analysed with linear mixed models (LMMs) or generalized linear  
154 mixed models (GLMMs) using the *lmer*, respectively *glmer*, functions from the *lme4* package  
155 for R (Bates et al., 2015). Response variables were orthopteran densities, species richness,  
156 vegetation height and temperatures; they were analysed with either Poisson (Caelifera and  
157 Ensifera densities) or Gaussian (others) distribution. Though, vegetation height had to be log-  
158 transformed in order to achieve normal distribution of residuals. The fixed effects were the  
159 treatments (C, I, F, I+F 1/3, I+F 2/3, I+F 3/3), and the random intercept effects were the study  
160 sites in all the analyses. When using the Gaussian distribution, p-values were obtained using  
161 the *lmerTest* package Kuznetsova, 2017 #775}. Caelifera and Ensifera responses were  
162 analysed separately as they differ in their ecology (Baur et al., 2006). Vegetation height,  
163 temperature and density data were analysed per sampling session while species data were  
164 pooled. Models always fulfilled model assumptions, notably residuals normal distribution and  
165 homoscedasticity.

166 Structural equation modelling (SEM), using the *lavaan* package (Rosseel, 2012), were  
167 further used to determine if fertilisation and irrigation influence orthopterans directly or/and  
168 indirectly through changes in vegetation height or aboveground temperature. In this SEM  
169 analysis, the water and slurry inputs were treated as two continuous variables with four levels:  
170 control with no input = 0; I+F 1/3 = 1; I, F and I+F 2/3 = 2; and I+F 3/3 = 3. As a first step, a  
171 set of candidate models was developed. Candidate models always included slurry and water  
172 inputs as two independent variables, and then their effects on orthopterans were either direct,



173 indirect through vegetation height or aboveground temperature, or both. In addition, the  
174 number of paths was set to maximum four which led to a total of twenty candidate models  
175 (see Appendix 2 for a graphical representation of all SEM candidate models). Second, all  
176 models were ran and kept only if the overall fit of the respective model was satisfactory. To  
177 assess model fit, the chi-square test (if  $P > 0.05$ ), the comparative fit index CFI (if CFI  $>$   
178 0.95), the root mean square error of approximation RMSEA (if RMSEA  $< 0.07$ ) and the  
179 standardised root mean square residuals SRMR (if SRMR  $< 0.08$ ) were used (Hooper et al.  
180 2008). Third, retained models were ranked based on AIC values (Akaike information  
181 criterion) and the model with the lowest AIC plus the model(s) within a  $\Delta$  AIC  $< 2$  were  
182 considered the most plausible model(s). If several models were ranked within a  $\Delta$  AIC  $< 2$ ,  
183 the model with the highest R-square was chosen as best model. The *lavaan.survey* package,  
184 which applies robust maximum likelihood method to estimate the standard errors, was used to  
185 include the meadows as random effect in the SEM (Oberski, 2014). All statistics were  
186 performed using R version 3.6.1 (R Core Team, 2019).

187

### 188 **3. Results**

189 Due to unfortunate field circumstances, orthopteran densities could not be sampled in site  
190 Cordona before mowing. Similarly, no aboveground temperatures were recorded in Eison and  
191 Grimentz after mowing. Therefore all related analyses were based on  $n = 11$  or  $n = 10$  sites  
192 respectively.

193

#### 194 *3.1 Orthopterans density*

195 Mean density of orthopterans varied greatly among meadows and plots. It ranged from 0.13 to  
196 24.38 individuals per  $m^2$  during the first sampling session and from 0.65 to 27.38 individuals  
197 per  $m^2$  during the second sampling session. Treatments were found to have significant effects

198 on Caelifera densities while none were detected on Ensifera. Note that low densities of  
199 Ensifera limited the power of the analysis on this suborder.

200 Before mowing the highest Caelifera densities were found within C-plots, mean  $\pm$   
201 standard error (SE) =  $8.42 \pm 2.73$ , that hosted ~30–40% more individuals than I-plots ( $5.68 \pm$   
202  $2.05$ ,  $P = 0.016$ ) and F-plots ( $4.77 \pm 1.82$ ,  $P < 0.001$ ) and >70% more individuals than I+F  
203 1/3-plots ( $2.43 \pm 0.66$ ,  $P < 0.001$ ), I+F 2/3-plots ( $2.02 \pm 0.87$ ,  $P < 0.001$ ) and I+F 3/3-plots  
204 ( $2.26 \pm 0.81$ ,  $P < 0.001$ ; see Fig. 1a and Appendix 3 for detailed model outputs). Concerning  
205 the Ensifera, the highest densities were found within F-plots ( $0.94 \pm 0.16$ ) and the lowest  
206 within I+F 3/3-plots ( $0.45 \pm 0.14$ ), though differences were not statistically significant (Fig.  
207 1b and Appendix 3). C-plots ( $0.66 \pm 0.18$ ), I-plots ( $0.80 \pm 0.16$ ), I+F 1/3-plots ( $0.53 \pm 0.23$ )  
208 and I+F 2/3-plots ( $0.57 \pm 0.17$ ) had intermediate densities. After mowing Caelifera and  
209 Ensifera densities did not differ across treatments (Fig. 1c, Fig. 1d and Appendix 3).

210

### 211 *3.2 Orthopteran species richness*

212 A total of 21 species was recorded within all plots, seven of which were Ensifera and fourteen  
213 of which were Caelifera (see Appendix 1 for detailed list). The minimum number of species  
214 found within a plot was one and the maximum was nine. Management practices significantly  
215 affected the Caelifera species richness. The highest Caelifera species richness was found  
216 within C-plots ( $4.6 \pm 0.5$ ), that hosted similar species number than I-plots ( $4.25 \pm 0.5$ ) and F-  
217 plots ( $4.2 \pm 0.5$ ) but ~30% more species than I+F 1/3-plots ( $3.2 \pm 0.5$ ,  $P < 0.001$ ) and I+F 2/3-  
218 plots ( $3.5 \pm 0.5$ ,  $P = 0.004$ ) and 50% more species than I+F 3/3-plots ( $2.3 \pm 0.4$ ,  $P < 0.001$ ;  
219 see Fig. 2a and Appendix 4 for detailed model outputs). Contrariwise, no significant effects  
220 were detected on the Ensifera species richness (see Fig. 2b and Appendix 4).

221

### 222 *3.3 Vegetation height*

223 Before mowing vegetation stratum height was the tallest in I+F 3/3-plots ( $61.8 \text{ cm} \pm 3.5 \text{ cm}$ ),  
224 it was slightly shorter in I+F 1/3-plots ( $52.1 \pm 7.7$ ,  $P = 0.016$ ), I+F 2/3-plots ( $51.9 \pm 2.3$ ,  $P =$   
225  $0.080$ ) and F-plots ( $49.9 \pm 3.4$ ,  $P = 0.023$ ) while it grew half less in C-plots ( $31.8 \pm 2.9$ ,  $P <$   
226  $0.001$ ) and I-plots ( $36.9 \pm 3.1$ ,  $P < 0.001$ ; see Fig. 3a and Appendix 5 for detailed model  
227 outputs). After mowing the same trend was observed with tallest sward found within I+F 3/3-  
228 plots ( $24.2 \pm 2.0$ ), followed by I+F 2/3-plots ( $18.3 \pm 2.2$ ,  $P = 0.006$ ) and then I+F 1/3-plots  
229 ( $14.0 \pm 2.2$ ,  $P < 0.001$ ), F-plots ( $12.8 \pm 2.2$ ,  $P < 0.001$ ) and I-plots ( $12.3 \pm 1.2$ ,  $P < 0.001$ ),  
230 while C-plots vegetation ( $9.0 \pm 2.2$ ,  $P < 0.001$ ) was more than twice shorter (Fig. 3b and  
231 Appendix 5).

232

### 233 *3.4 Temperature*

234 Before mowing, mean diurnal aboveground temperature was the warmest in C-plots ( $22.4 \pm$   
235  $0.9 \text{ }^\circ\text{C}$ ), then temperatures in I-plots ( $20.9 \pm 0.7$ ), I+F 1/3-plots ( $20.6 \pm 1.4$ ), I+F 2/3-plots  
236 ( $20.5 \pm 0.6$ ) and F-plots ( $20.3 \pm 0.7$ ) were  $1.5\text{--}2.1 \text{ }^\circ\text{C}$  colder (all  $P < 0.05$  except for I-plots)  
237 while it was over  $4.2 \text{ }^\circ\text{C}$  colder in I+F 3/3-plots than in C-plot ( $18.2 \pm 0.5$ ,  $P < 0.001$ ). See  
238 Fig. 3a and Appendix 6 for detailed model outputs. Given the noticeable negative relationship  
239 between temperatures and vegetation heights, an additional LMM was run between both (Fig.  
240 4; Estimate =  $-3.383$ , SE =  $0.894$ ,  $P < 0.001$ ).

241 After mowing, diurnal aboveground temperature was the highest in C-plots ( $29.9 \pm$   
242  $0.9$ ) and F-plots ( $30.2 \pm 0.9$ ). I+F 1/3-plots ( $29.5 \pm 1.2$ ), I+F 3/3-plots ( $28.5 \pm 1.4$ ), I-plots  
243 ( $28.4 \pm 0.7$ ) and I+F 2/3-plots ( $28.3 \pm 1.1$ ) were respectively  $0.4$  to  $1.7 \text{ }^\circ\text{C}$  colder than C-plots,  
244 but differences were not statistically significant (Fig. 3b and Appendix 6). Treatments did  
245 affect nocturnal temperatures but differences were not biologically relevant (in order of  $0.1\text{--}$   
246  $0.2 \text{ }^\circ\text{C}$ ) and are thus not further discussed.

247

### 248 3.5 Structural equation modeling (SEM)

249 As treatments did not affect Ensifera densities nor species richness SEMs were run only on  
250 Caelifera. Before mowing the best SEM model (chi-square = 0.084, d.f. = 1,  $P = 0.772$ ; CFI =  
251 1; RMSEA < 0.001; SRMR = 0.006) explaining changes in Caelifera densities included both  
252 indirect effects of slurry and water inputs through vegetation height plus a direct effect of  
253 water input (Fig. 5a). The best SEM models explaining Caelifera densities after mowing (chi-  
254 square = 0.612, d.f. = 1,  $P = 0.434$ ; CFI = 1; RMSEA < 0.001; SRMR = 0.013) and Caelifera  
255 species richness (chi-square = 0.612, d.f. = 1,  $P = 0.434$ ; CFI = 1; RMSEA < 0.001; SRMR =  
256 0.014) were the same. They included both direct effects of slurry and water inputs plus an  
257 indirect effect of water input through aboveground temperature measured after mowing (Fig.  
258 5b and 5c). However, for the density after mowing, only one path was statistically significant;  
259 i.e. the effect of water input on aboveground temperature. For species richness the direct  
260 effect of slurry input on Caelifera species richness was significant, as well as the effect of  
261 water input on aboveground temperature coupled with a non-significant effect ( $P = 0.253$ ) of  
262 aboveground temperature on Caelifera species richness. For Caelifera species richness, all  
263 combination of SEM models with vegetation height and aboveground temperature measured  
264 before and after the first mowing were tried.

265

## 266 4. Discussion

267 This study shows that mountain grassland fertilisation and irrigation combined, greatly affects  
268 Caelifera (grasshoppers) by decreasing their densities and species richness, but that the use of  
269 irrigation only (at two-thirds of the maximum dose) has relatively limited impacts. On the  
270 other hand, overall Ensifera (bush crickets) densities and species richness did not respond to  
271 the management treatments. This study also demonstrates that intensification practices induce  
272 an important drop in aboveground temperatures parallel to an increase in vegetation heights.

273 Microclimate cooling has often been suggested as a potential mechanism to explain responses  
274 of various arthropod groups to intensification (e.g. Gardiner et al., 2002; Löffler and  
275 Fartmann, 2017; Marini et al., 2009), but the link had never been clearly demonstrated.

276 In the following subsections we first present the effects of the management practices  
277 on vegetation and microclimate. We then state its effects on orthopteran density and species  
278 richness and discuss how these are linked to vegetation height and microclimate. Finally we  
279 discuss the conservation implications of the present study.

280

#### 281 *4.1 Effects on vegetation and microclimate*

282 Combined irrigation and fertilisation led to twice taller swards in the most intensively  
283 managed plots (I+F 3/3) compared to control plots, which was expected as water and nitrogen  
284 are limiting factor for vegetation growth in dry mountain region (Bassin et al., 2012; Tasser  
285 and Tappeiner, 2002). Before the first cut, irrigation alone had lesser effect, likely as a  
286 consequence of the wet spring of 2013. However after the cut both inputs had an equivalent  
287 positive effect on plants regrowth and their combination amplified their respective effects.

288 Aboveground temperatures were linked to vegetation height: the taller the sward  
289 became the less sunlight reached the ground and the less it was warmed (see also Song et al.,  
290 2013). Consequently the temperatures differences between the most intensively managed  
291 plots and the controls were of up to 4.2°C at 10 cm aboveground. After the cut, vegetation  
292 regrew progressively which reduced the surface temperature differences among plots.

293 Vegetation height is not the only factor explaining microclimate; other parameters such as  
294 vegetation density and canopy cover do influence quantity of sunshine reaching the soil and  
295 thus indirectly temperature (van Wingerden et al., 1992), as well as sprinkler irrigation as  
296 demonstrated here. This explains why surface temperatures varied more along the  
297 intensification gradient than swards heights.

298

299 *4.2 Effects on orthopteran densities*

300 Different responses were observed between the two suborders. Before mowing Caelifera  
301 densities were respectively 30 to 40% lower in plots that had been either irrigated or fertilised.  
302 The combination of both inputs was even worse leading to over 70% reduction in density  
303 regardless of quantities applied (i.e. densities were divided by three). Our SEM indicates that  
304 this negative effect is due to a combination of a direct negative effect of water input and an  
305 indirect effect of slurry input through vegetation height. As most individuals were low-mobile  
306 larvae during the first sampling session their distribution reflects their birth place. Therefore  
307 reasons for differences could be one or a combination of following factors: 1) females  
308 favoured lower sward sites to oviposit; 2) larval development was altered and survival rate  
309 was lower in plots with tall vegetation (Willott and Hassall, 1998); or 3) eggs hatching was  
310 delayed in taller vegetation and had not occurred yet at the time plots were sampled, which is  
311 detrimental to population as it reduces individuals chance to complete their life cycle and to  
312 reproduce (van Wingerden et al., 1991; Weiss et al., 2013). Management intensification did  
313 not impact Ensifera densities. This might reflect the fact that in average Ensifera emerged  
314 earlier in the season compared to Caelifera, when vegetation height and thus microclimate  
315 differences were less pronounced among management practices. Moreover their development  
316 is globally less dependent on temperatures (Bieringer and Zulka, 2003).

317         The mowing event may have dispersed the individuals all over the meadow area  
318 (Humbert et al., 2012) so the densities of Caelifera found during the second sampling session  
319 were not directly related to number found during the first sampling session. Nevertheless, we  
320 observed that generalist species such as *P. parallelus* dispersed more or less evenly across the  
321 plots while the specialized thermophilous species such as *S. lineatus* or *Omocestus*  
322 *haemorrhoidales* recolonized the warmest plots. A boom in Caelifera eggs hatching probably

323 occurred in the days following mowing due to warmer microclimate as about half of the  
324 individuals sampled during the second session were still at larval stage. After mowing  
325 Ensifera were slightly, though not statistically, more numerous in more intensively managed  
326 plots and there were virtually no more larvae. This pattern was due to the preponderant  
327 presence of adults *Tettigonia viridissima* and *Roeseliana roeselii* that favoured the tall swards  
328 found in intensified plots. However densities remained very low with less than 0.5 Ensifera  
329 per m<sup>2</sup>.

330 We had hypothesized that at moderate management intensity level orthopteran  
331 densities would be maximized, benefiting from increased food supply without being impacted  
332 by microclimate changes (Hudewenz et al., 2012). However, results are not in accordance  
333 with our hypothesis. Overall results seem to indicate that in the investigated mountain  
334 meadows food resource is not a limiting factor for Caelifera while temperature might be.

335

#### 336 *4.3 Effects on orthopteran species richness*

337 Highest Caelifera species richness was found in the control plots and was maintained in plots  
338 that were either irrigated or fertilised but the combination of both inputs had detrimental  
339 effects: species loss reached 50% in the most intensive plots, i.e. richness was divided by two.  
340 This trend is in line with previous observational studies done in the Alps or Prealps (Marini et  
341 al., 2008; Schlegel and Schnetzler, 2018), as well as conclusions from studies carried on in  
342 lowland regions (e.g. Chisté et al., 2016; Knop et al., 2006) and it confirms the general  
343 detrimental effects of grassland management intensification on orthopteran species richness.

344 The SEM indicates strong direct negative effects of slurry and water input, plus an  
345 indirect effect of water input through changes in aboveground temperature, though the last  
346 path between aboveground temperature and Caelifera species richness was not statistically  
347 significant. The direct effect of slurry and water input should not be interpreted as strictly

348 direct, it could also be indirect through variables not included in the model. It is known that in  
349 addition to aboveground temperature, orthopteran community composition is related to  
350 several other parameters such as vegetation structural heterogeneity (Jerrentrup et al., 2014),  
351 percentage of bare ground (Weiss et al., 2013), plant species composition (Fournier et al.,  
352 2017; Gardiner et al., 2002; Ibanez et al., 2013), and management regime (e.g. our control  
353 plots were cut once a year while irrigated and fertilised plots twice; see also Buri et al., 2013).  
354 The parallel drop in species richness and temperatures suggests that either thermophile  
355 species chose deliberately not to oviposit within more intensive plots – showing a cumulative  
356 effect from previous year – or the eggs laid within colder plots poorly developed and larvae  
357 never reached maturity (Willott and Hassall, 1998). Willott and Hassall (1998) showed that a  
358 difference of 5°C in ambient temperature – air temperature differences reached 4.2°C in our  
359 case – considerably affects Caelifera fitness: most sensitive species experiments a  
360 development time 50% longer, a reduction of 25% in body mass and a drop of 50% in pods  
361 production. Altogether, our findings support the hypothesis that the microclimate conditions  
362 within intensively managed plots became too cold for thermophilous species. Though, we do  
363 not claim that it is the only explanatory mechanism. *De facto* temperature changes do not  
364 explain the relatively lower Caelifera species richness found within low-intensity plots (I+F  
365 1/3) compared to irrigated or fertilised only plots.

366 Contrariwise to Caelifera, Ensifera species richness was not affected by  
367 intensification. This suborder is known to be less sensitive to microclimate than Caelifera and  
368 to depend more on vegetation structure (Baur et al., 2006; Bieringer and Zulka, 2003).  
369 However, a change in community composition accompanying intensification was noticed.  
370 Large species such as *T. viridissima* or generalists such as *R. roeselii* favouring tall vegetation  
371 which offers good singing spots and shelter (Baur et al., 2006; Buri et al., 2013) were more  
372 often found in intensively managed plots compared to extensively managed plots. In the



373 contrary *Plactycleis albopunctata* or *Decticus verrucivorus* which are species associated with  
374 warm and dry habitat (Baur et al., 2006) were occasionally found in control plots, but not  
375 within intensively managed ones. This reflects the ecological diversity of Ensifera and might  
376 explain why their global species richness remained stable among experimental plots. It has to  
377 be noted that the power of the analyses was constrained due to relatively low Ensifera species  
378 richness (the average  $\pm$  standard deviation was  $1.1 \pm 1.0$  across all plots).

379

#### 380 *4.4 Conclusions and conservation implications*

381 Aerial irrigation and fertilisation with liquid manure are two novel management practices  
382 currently spreading in dry alpine regions (Riedener et al., 2013). While on one hand these  
383 practices benefit biodiversity in the sense that by increasing grass yield (Andrey et al., 2014;  
384 Bassin et al., 2012) they support continuity of local farming so as to keep montane and  
385 subalpine semi-natural grasslands open (Riedener et al., 2014; Rudmann-Maurer et al., 2008),  
386 on the other hand they become a threat to biodiversity when too much inputs are applied (this  
387 study).

388 In contrast to observational studies, the experimental approach adopted in this study  
389 has the advantage that measured differences between treatments were not affected (biased) by  
390 environmental parameters such as soil, elevation or surrounding landscape, neither by climate  
391 or past management history. In addition, results are based on controlled, quantitatively based,  
392 levels of grassland irrigation and fertilisation that are related to what is done in the practice.  
393 On the other hand it has some limitations due to the size and proximity of the plots that could  
394 have blurred the signal. Despite the close proximity of the experimental plots, very clear  
395 evidences that intensification lower both Caelifera densities and species richness were found,  
396 which are then conservative findings.

397 Results demonstrate that the use of irrigation input alone has moderate impacts on  
398 orthopterans and on microclimate while the combination of irrigation and fertilisation inputs  
399 is harmful to orthopterans even at low dose. The first finding is good news for all stakeholders  
400 (including farmers, conservationists and policy-makers) as irrigation alone can increase hay  
401 yield without affecting biodiversity (see also Jeangros and Bertola, 2000; Riedener et al.,  
402 2013) and is allowed in subsidized extensively managed meadows registered under Swiss  
403 agri-environment schemes. On the other hand fertilisation alone and the combination of both  
404 inputs must be forbidden in grasslands where conservation of invertebrate and vertebrate  
405 fauna is of concern as a drop in grassland invertebrate densities can have dramatic bottom-up  
406 effects on higher trophic levels (Britschgi et al., 2006). Management intensification had even  
407 stronger impacts on Caelifera densities than on species richness as detrimental effects were  
408 already visible in low intensity plots. Combine with our precedent findings on plants (REF  
409 (Andrey et al., 2014; Lessard-Therrien et al., 2017), bryophytes (Boch et al., 2018),  
410 Auchenorrhyncha (Andrey et al., 2016), spiders and ground beetles (Lessard-Therrien et al.,  
411 2018), this study darkens the optimistic perspective to find an intermediate management  
412 intensity threshold that provides decent agronomical yield and that has only limited negative  
413 effects on biodiversity.

414 The second important contribution of this study is the quantitative assessment of  
415 changes in microhabitat and -climate induced by intensification. The effective cooling (more  
416 than 4 °C at 10 cm above ground) measured exceeded expectations and can have huge  
417 impacts on the development of local micro-fauna (Logan et al., 2006). While we acknowledge  
418 that we only prove a causal connection between changes in vegetation height and Caelifera  
419 densities before mowing, aboveground temperature was retained (regardless of its non-  
420 statistically significant last path) in the best SEMs to explain Caelifera density after mowing  
421 and species richness, and the models showed very good fitting properties. In addition there

422 was a strong negative correlation between vegetation height and sward temperature which  
423 highlights that both effects can hardly be separated.

424

## 425 **5. Acknowledgment**

426 We would like to thank A. Hayoz-Andrey for help implementing the study, S. Mettaz, M.  
427 Clerc, G. Delley, S. Laribi, P. Buri, J. Flury, A. Spang, D. Schlunke and J. Coflica for field  
428 assistance, our colleagues at the Division of Conservation Biology, University of Bern, as  
429 well as the members of the project accompanying group. We are also thankful to the farmers  
430 for their collaboration. This project was financially supported by the Cantons of Graubünden  
431 and Valais, by the Swiss National Science Foundation (grants 31003A\_125398 and 31003A  
432 149656 to RA) and the Swiss Federal Offices for Agriculture and the Environment.

433

434 **6. References**

- 435 Andrey, A., Humbert, J.-Y., Arlettaz, R., 2016. Functional response of leaf-and planthoppers  
436 to modern fertilisation and irrigation of hay meadows. *Basic Appl. Ecol.* 17, 627-637.
- 437 Andrey, A., Humbert, J.-Y., Pernollet, C., Arlettaz, R., 2014. Experimental evidence for the  
438 immediate impact of fertilization and irrigation upon the plant and invertebrate  
439 communities of mountain grasslands. *Ecol. Evol.* 4, 2610-2623.
- 440 Arlettaz, R., 1996. Feeding behaviour and foraging strategy of free-living mouse-eared bats,  
441 *Myotis myotis* and *Myotis blythii*. *Anim. Behav.* 51, 1-11.
- 442 Báldi, A., 2008. Habitat heterogeneity overrides the species-area relationship. *J. Biogeogr.* 35,  
443 675-681.
- 444 Bassin, S., Schalajda, J., Vogel, A., Suter, M., 2012. Different types of sub-alpine grassland  
445 respond similarly to elevated nitrogen deposition in terms of productivity and sedge  
446 abundance. *J. Veg. Sci.* 23, 1024-1034.
- 447 Bates, D., Maechler, M., Bolker, B., Walker, S., 2015. Fitting linear mixed-effects models  
448 Using lme4. *J. Stat. Softw.* 67, 1-48.
- 449 Baur, B., Baur, H., Roesti, C., Roesti, D., Thorens, P., 2006. Sauterelles, Grillons et Criquets  
450 de Suisse. Haupt, Bern, CH.
- 451 Bieringer, G., Zulka, K.P., 2003. Shading out species richness: edge effect of a pine plantation  
452 on the Orthoptera (Tettigoniidae and Acrididae) assemblage of an adjacent dry grassland.  
453 *Biodiversity & Conservation* 12, 1481-1495.
- 454 Blumer, P., Diemer, M., 1996. The occurrence and consequences of grasshopper herbivory in  
455 an alpine grassland, Swiss Central Alps. *Arctic Alpine Res.* 28, 435-440.
- 456 Boch, S., Allan, E., Humbert, J.Y., Kurtogullari, Y., Lessard-Therrien, M., Muller, J., Prati, D.,  
457 Rieder, N.S., Arlettaz, R., Fischer, M., 2018. Direct and indirect effects of land use on  
458 bryophytes in grasslands. *Sci. Total Environ.* 644, 60-67.

- 459 Britschgi, A., Spaar, R., Arlettaz, R., 2006. Impact of grassland farming intensification on the  
460 breeding ecology of an indicator insectivorous passerine, the Whinchat *Saxicola rubetra*:  
461 Lessons for overall Alpine meadowland management. *Biol. Conserv.* 130, 193-205.
- 462 Buri, P., Arlettaz, R., Humbert, J.-Y., 2013. Delaying mowing and leaving uncut refuges  
463 boosts orthopterans in extensively managed meadows: Evidence drawn from field-scale  
464 experimentation. *Agr. Ecosyst. Environ.* 181, 22-30.
- 465 Calame, F., Jeangros, B., Troxler, J., 1992. Détermination des quantités d'eau d'arrosage  
466 optimales pour des prairies naturelles de la vallée de Conches. *Revue suisse Agric.* 24,  
467 121-127.
- 468 Chisté, M.N., Mody, K., Gossner, M.M., Simons, N.K., Köhler, G., Weisser, W.W., Blüthgen,  
469 N., 2016. Losers, winners, and opportunists: How grassland land-use intensity affects  
470 orthopteran communities. *Ecosphere* 7, e01545.
- 471 Fournier, B., Mouly, A., Moretti, M., Gillet, F., 2017. Contrasting processes drive alpha and  
472 beta taxonomic, functional and phylogenetic diversity of orthopteran communities in  
473 grasslands. *Agr. Ecosyst. Environ.* 242, 43-52.
- 474 Gardiner, T., Pye, M., Field, R., Hill, J., 2002. The influence of sward height and vegetation  
475 composition in determining the habitat preferences of three Chorthippus species  
476 (Orthoptera: Acrididae) in Chelmsford, Essex, UK. *J. Orthoptera Res.* 11, 207-213.
- 477 Haddad, N.M., Crutsinger, G.M., Gross, K., Haarstad, J., Knops, J.M.H., Tilman, D., 2009.  
478 Plant species loss decreases arthropod diversity and shifts trophic structure. *Ecol. Lett.* 12,  
479 1029-1039.
- 480 Haddad, N.M., Haarstad, J., Tilman, D., 2000. The effects of long-term nitrogen loading on  
481 grassland insect communities. *Oecologia* 124, 73-84.
- 482 Haddad, N.M., Tilman, D., Haarstad, J., Ritchie, M., Knops, J.M.H., 2001. Contrasting effects  
483 of plant richness and composition on insect communities: A field experiment. *Am. Nat.*

- 484 158, 17-35.
- 485 Hudewenz, A., Klein, A.-M., Scherber, C., Stanke, L., Tschardtke, T., Vogel, A., Weigelt, A.,  
486 Weisser, W.W., Ebeling, A., 2012. Herbivore and pollinator responses to grassland  
487 management intensity along experimental changes in plant species richness. *Biol. Conserv.*  
488 150, 42-52.
- 489 Humbert, J.-Y., Ghazoul, J., Richner, N., Walter, T., 2012. Uncut grass refuges mitigate the  
490 impact of mechanical meadow harvesting on orthopterans. *Biol. Conserv.* 152, 96–101.
- 491 Ibanez, S., Manneville, O., Miquel, C., Taberlet, P., Valentini, A., Aubert, S., Coissac, E.,  
492 Colace, M.-P., Duparc, Q., Lavorel, S., Moretti, M., 2013. Plant functional traits reveal the  
493 relative contribution of habitat and food preferences to the diet of grasshoppers. *Oecologia*  
494 173, 1459-1470.
- 495 Jeangros, B., Bertola, C., 2000. Effets de l'arrosage sur la végétation des prairies permanentes  
496 d'une région du Haut-Valais. *Revue suisse Agric.* 32, 189-194.
- 497 Jerrentrup, J.S., Wrage-Mönnig, N., Röver, K.-U., Isselstein, J., 2014. Grazing intensity  
498 affects insect diversity via sward structure and heterogeneity in a long-term experiment. *J.*  
499 *Appl. Ecol.* 51, 968-977.
- 500 Joern, A., Provin, T., Behmer, S.T., 2012. Not just the usual suspects: insect herbivore  
501 populations and communities are associated with multiple plant nutrients. *Ecology* 93,  
502 1002-1015.
- 503 Knop, E., Kleijn, D., Herzog, F., Schmid, B., 2006. Effectiveness of the Swiss agri-  
504 environment scheme in promoting biodiversity. *J. Appl. Ecol.* 43, 120-127.
- 505 Le Provost, G., Gross, N., Börger, L., Deraison, H., Roncoroni, M., Badenhausser, I., 2017.  
506 Trait-matching and mass effect determine the functional response of herbivore  
507 communities to land-use intensification. *Funct. Ecol.* 31, 1600-1611.
- 508 Lessard-Therrien, M., Humbert, J.-Y., Arlettaz, R., 2017. Experiment-based recommendations

- 509 for biodiversity-friendly management of mountain hay meadows. *Appl. Veg. Sci.* 20, 352-  
510 362.
- 511 Lessard-Therrien, M., Humbert, J.-Y., Hajdamowicz, I., Stańska, M., van Klink, R., Lischer,  
512 L., Arlettaz, R., 2018. Impacts of management intensification on ground-dwelling beetles  
513 and spiders in semi-natural mountain grasslands. *Agr. Ecosyst. Environ.* 251, 59-66.
- 514 Löffler, F., Fartmann, T., 2017. Effects of landscape and habitat quality on Orthoptera  
515 assemblages of pre-alpine calcareous grasslands. *Agr. Ecosyst. Environ.* 248, 71-81.
- 516 Logan, J.D., Wolesensky, W., Joern, A., 2006. Temperature-dependent phenology and  
517 predation in arthropod systems. *Ecological modelling* 196, 471-482.
- 518 Marini, L., Fontana, P., Battisti, A., Gaston, K.J., 2009. Agricultural management, vegetation  
519 traits and landscape drive orthopteran and butterfly diversity in a grassland-forest mosaic: a  
520 multi-scale approach. *Insect Conserv. Diver.* 2, 213-220.
- 521 Marini, L., Fontana, P., Scotton, M., Klimek, S., 2008. Vascular plant and Orthoptera diversity  
522 in relation to grassland management and landscape composition in the European Alps. *J.*  
523 *Appl. Ecol.* 45, 361-370.
- 524 Maurer, K., Weyand, A., Fischer, M., Stocklin, J., 2006. Old cultural traditions, in addition to  
525 land use and topography, are shaping plant diversity of grasslands in the Alps. *Biol.*  
526 *Conserv.* 130, 438-446.
- 527 Morris, M.G., 2000. The effects of structure and its dynamics on the ecology and conservation  
528 of arthropods in British grassland. *Biol. Conserv.* 95, 129-142.
- 529 Nakagawa, S., Schielzeth, H., 2013. A general and simple method for obtaining R<sup>2</sup> from  
530 generalized linear mixed-effects models. *Methods Ecol. Evol.* 4, 133-142.
- 531 Oberski, D., 2014. *lavaan.survey: An R Package for Complex Survey Analysis of Structural*  
532 *Equation Models.* *J. Stat. Softw.* 57, 1-27.
- 533 R Core Team, 2019. *R: A language and environment for statistical computing.* R Foundation

- 534 for Statistical Computing, Vienna, Austria.
- 535 Riedener, E., Rusterholz, H.-P., Baur, B., 2013. Effects of different irrigation systems on the  
536 biodiversity of species-rich hay meadows. *Agr. Ecosyst. Environ.* 164, 62– 69.
- 537 Riedener, E., Rusterholz, H.-P., Baur, B., 2014. Land-use abandonment owing to irrigation  
538 cessation affects the biodiversity of hay meadows in an arid mountain region. *Agr. Ecosyst.*  
539 *Environ.* 185, 144-152.
- 540 Rosseel, Y., 2012. lavaan: An R Package for Structural Equation Modeling. *J. Stat. Softw.* 48,  
541 1-36.
- 542 Rudmann-Maurer, K., Weyand, A., Fischer, M., Stocklin, J., 2008. The role of landuse and  
543 natural determinants for grassland vegetation composition in the Swiss Alps. *Basic Appl.*  
544 *Ecol.* 9, 494-503.
- 545 Schlegel, J., Schnetzler, S., 2018. Heuschrecken (Orthoptera) in Biodiversitätsförderflächen  
546 der voralpinen Kulturlandschaft Schönenbergs (Schweiz, Kanton Zürich) mit Trends seit  
547 1990. *Alpine Entomology* 2, 77.
- 548 Schwab, A., Dubois, D., Fried, P.M., Edwards, P.J., 2002. Estimating the biodiversity of hay  
549 meadows in north-eastern Switzerland on the basis of vegetation structure. *Agr. Ecosyst.*  
550 *Environ.* 93, 197-209.
- 551 Socher, S.A., Prati, D., Boch, S., Müller, J., Baumbach, H., Gockel, S., Hemp, A., Schöning,  
552 I., Wells, K., Buscot, F., 2013. Interacting effects of fertilization, mowing and grazing on  
553 plant species diversity of 1500 grasslands in Germany differ between regions. *Basic Appl.*  
554 *Ecol.* 14, 126-136.
- 555 Song, Y., Zhou, D., Zhang, H., Li, G., Jin, Y., Li, Q., 2013. Effects of vegetation height and  
556 density on soil temperature variations. *Chinese Science Bulletin* 58, 907-912.
- 557 Sutter, L., Albrecht, M., 2016. Synergistic interactions of ecosystem services: florivorous pest  
558 control boosts crop yield increase through insect pollination. *Proceedings of the Royal*



- 559 Society B: Biological Sciences 283, 20152529.
- 560 Tasser, E., Tappeiner, U., 2002. Impact of land use changes on mountain vegetation. Appl.  
561 Veg. Sci. 5, 173-184.
- 562 van Wingerden, W.K.R.E., Musters, J.C.M., Maaskamp, F.I.M., 1991. The influence of  
563 temperature on the duration of egg development in West European grasshoppers  
564 (Orthoptera, Acrididae). Oecologia 87, 417-423.
- 565 van Wingerden, W.K.R.E., van Kreveld, A.R., Bongers, W., 1992. Analysis of species  
566 composition and abundance of grasshoppers (Orth. Acrididae) in natural and fertilized  
567 grasslands. J. Appl. Entomol. 113, 138-152.
- 568 Veen, P., Jefferson, R., de Smidt, J., van der Straaten, J., 2009. Grasslands in Europe of high  
569 nature value. KNNV Publishing, Zeist, the Netherlands.
- 570 Vickery, J.A., Tallowin, J.R., Feber, R.E., Asteraki, E.J., Atkinson, P.W., Fuller, R.J., Brown,  
571 V.K., 2001. The management of lowland neutral grasslands in Britain: effects of  
572 agricultural practices on birds and their food resources. J. Appl. Ecol. 38, 647-664.
- 573 Weiss, N., Zucchi, H., Hochkirch, A., 2013. The effects of grassland management and aspect  
574 on Orthoptera diversity and abundance: site conditions are as important as management.  
575 Biodiver. Conserv. 22, 2167-2178.
- 576 Willott, S.J., Hassall, M., 1998. Life-history responses of British grasshoppers (Orthoptera :  
577 Acrididae) to temperature change. Funct. Ecol. 12, 232-241.
- 578 Wilson, J.D., Morris, A.J., Arroyo, B.E., Clark, S.C., Bradbury, R.B., 1999. A review of the  
579 abundance and diversity of invertebrate and plant foods of granivorous birds in northern  
580 Europe in relation to agricultural change. Agr. Ecosyst. Environ. 75, 13-30.
- 581 Woodcock, B.A., Potts, S.G., Tscheulin, T., Pilgrim, E., Ramsey, A.J., Harrison-Cripps, J.,  
582 Brown, V.K., Tallowin, J.R., 2009. Responses of invertebrate trophic level, feeding guild  
583 and body size to the management of improved grassland field margins. J. Appl. Ecol. 46,

584 920-929.

585

586

587

588 **Tables**

589 **Table 1:** Management practices applied to the six different experimental treatment plots.

590 Abbreviations for treatments: C = control; F = fertilised; I = irrigated; F+I 1/3, F+I 2/3 and

591 F+I 3/3 = fertilised and irrigated at respectively 1/3, 2/3 or 3/3 of the maximum dose. The

592 exact 3/3 dose of fertiliser applied at each site followed the management norm recommended

593 to achieve maximum hay yield at a given locality, and were classed in three groups. Note that

594 I and F, received the same amount of water or fertiliser as I+F 2/3.

| Management treatment | Mowing regime [no. of cut·yr <sup>-1</sup> ] | Irrigation [mm·week <sup>-1</sup> ] | Fertilisation [kg N·ha <sup>-1</sup> ·yr <sup>-1</sup> ] |         |         |
|----------------------|----------------------------------------------|-------------------------------------|----------------------------------------------------------|---------|---------|
|                      |                                              |                                     | Group 1                                                  | Group 2 | Group 3 |
| C                    | 1                                            | 0                                   | 0.0                                                      | 0.0     | 0.0     |
| I                    | 2                                            | 20                                  | 0.0                                                      | 0.0     | 0.0     |
| F                    | 2                                            | 0                                   | 53.3                                                     | 40.0    | 26.6    |
| I+F 1/3              | 2                                            | 10                                  | 26.6                                                     | 20.0    | 13.3    |
| I+F 2/3              | 2                                            | 20                                  | 53.3                                                     | 40.0    | 26.6    |
| I+F 3/3              | 2                                            | 30                                  | 80.0                                                     | 60.0    | 40.0    |

595

596 **Figures legends**

597 **Fig. 1.** Responses of orthopteran densities (individuals / m<sup>2</sup>) to the six different management  
598 treatments: a) Caelifera densities before mowing; b) Caelifera densities after mowing (note  
599 that in the IF3/3-plot a point at 31.9 individuals / m<sup>2</sup> do not appear on the figure); c) Ensifera  
600 densities before mowing; d) Ensifera densities after mowing. Abbreviations for treatments: C  
601 = control; F = fertilisation only; I = irrigation only, IF1/3 = irrigation and fertilisation at low  
602 dose, IF2/3 = irrigation and fertilisation at medium dose, IF3/3 = irrigation and fertilisation at  
603 high dose. Different letters indicate significant differences between treatments at an alpha  
604 rejection value set to 0.05. Bold lines represent medians, cross the means; boxes the first and  
605 third quantiles.

606 **Fig. 2.** Responses of Caelifera (a) and Ensifera (b) species richness to the six different  
607 management treatments. For treatment abbreviations and boxplot descriptions see legend of  
608 figure 1.

609 **Fig. 3.** Aboveground diurnal temperature (black circles) and vegetation height (grey squares)  
610 according to the six different management treatments, before (a) and after mowing (b). Mean  
611 values  $\pm$  SE of the raw data are shown. Different letters indicate significant differences  
612 between treatments at an alpha rejection value set to 0.05. For treatment abbreviations see  
613 legend of figure 1.

614 **Fig. 4.** Negative relationship between aboveground diurnal temperature and log-transformed  
615 vegetation height (in cm) before mowing. The regression line is drawn from the LMM outputs  
616 with 95% confidence intervals. Marginal r<sup>2</sup> (R2m) represents the percentage of variance  
617 explained by the fixed effects only, whereas conditional r<sup>2</sup> (R2c) is the percentage explained  
618 by both fixed and random effects grouped (Nakagawa and Schielzeth, 2013).

619

620 **Fig. 5.** Best structural equation model (SEM) explaining the influences of slurry and water  
621 inputs on: (a) Caelifera density before mowing; (b) Caelifera density after mowing; and (c)  
622 Caelifera species richness. Standardized path coefficients are shown beside each path, with  
623 the level of statistical significance indicated by asterisks (\* $P < 0.05$ ; \*\* $P < 0.01$ ; \*\*\* $P <$   
624  $0.001$ ). The width of the arrows depicts the strength of the effect and  $R^2$  values represent the  
625 proportion of variance explained for each dependent variable. All candidate SEM models can  
626 be found in Appendix 2.

627 **Figures**

628 **Fig. 1**

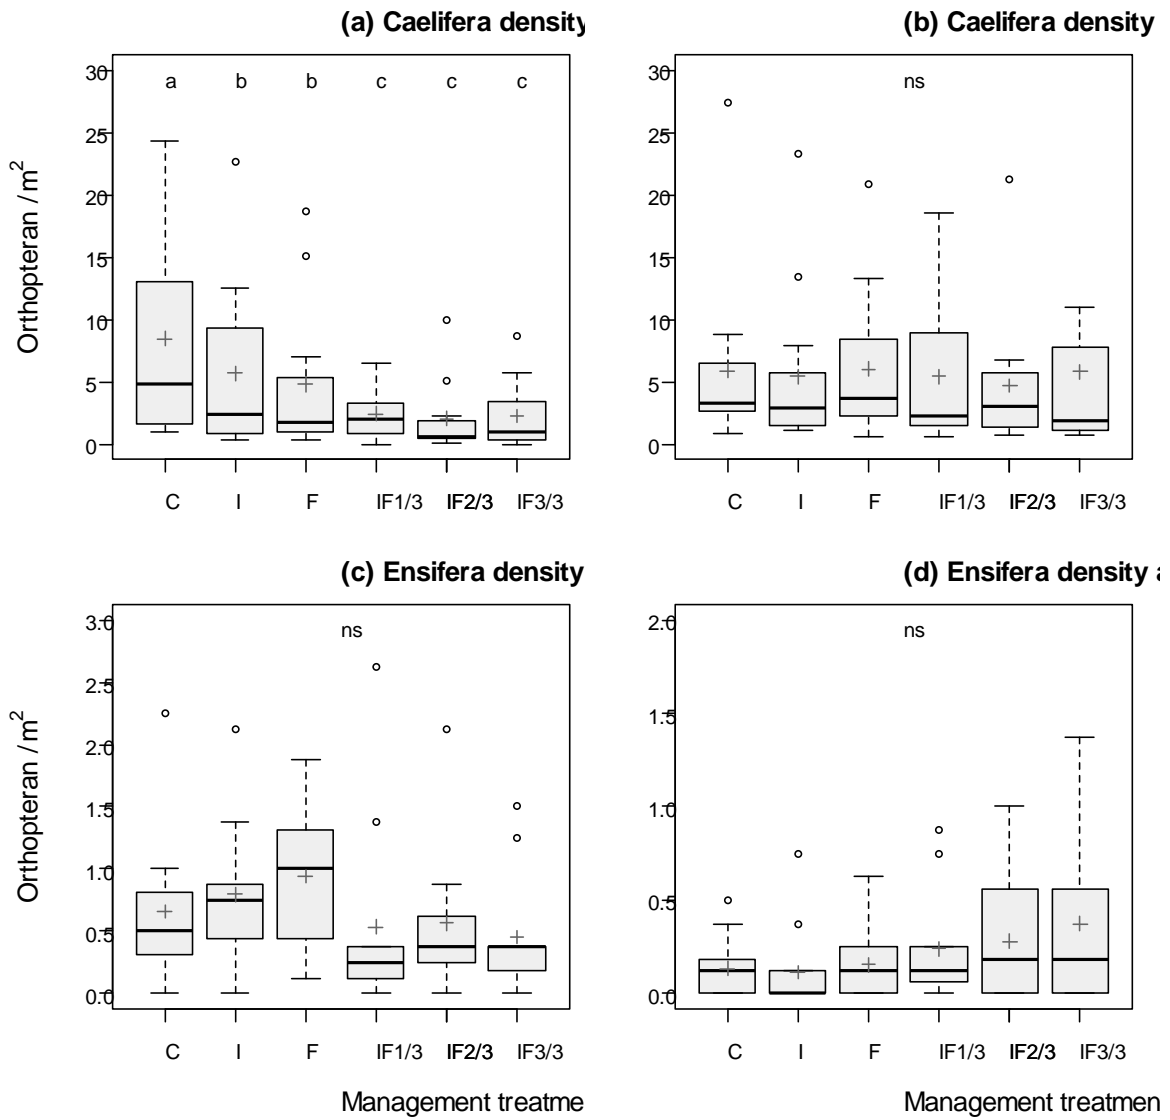

629

630 **Fig. 2**

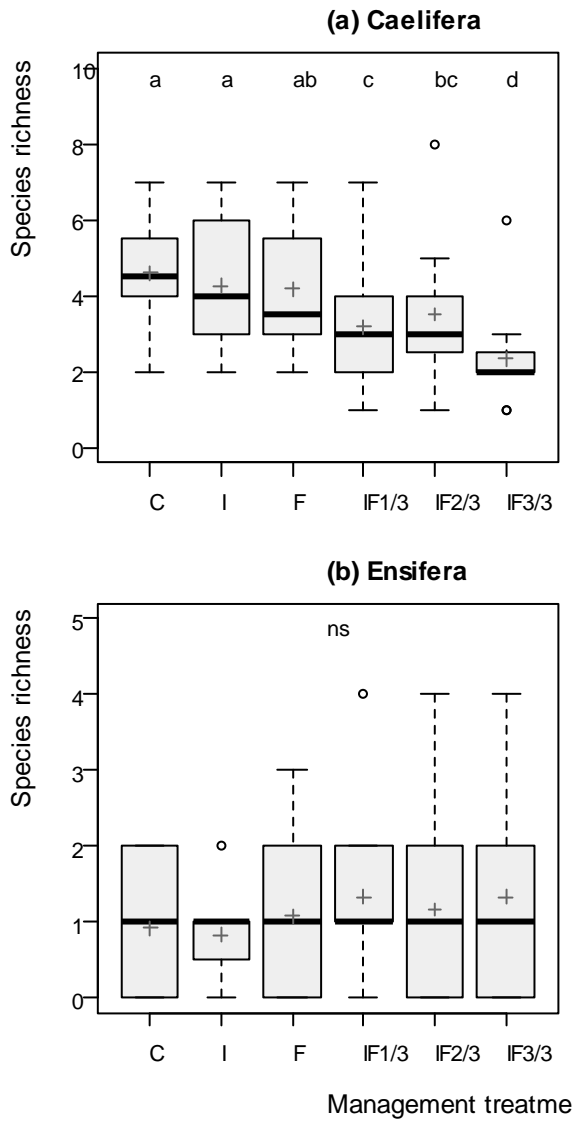

631

632 **Fig. 3**

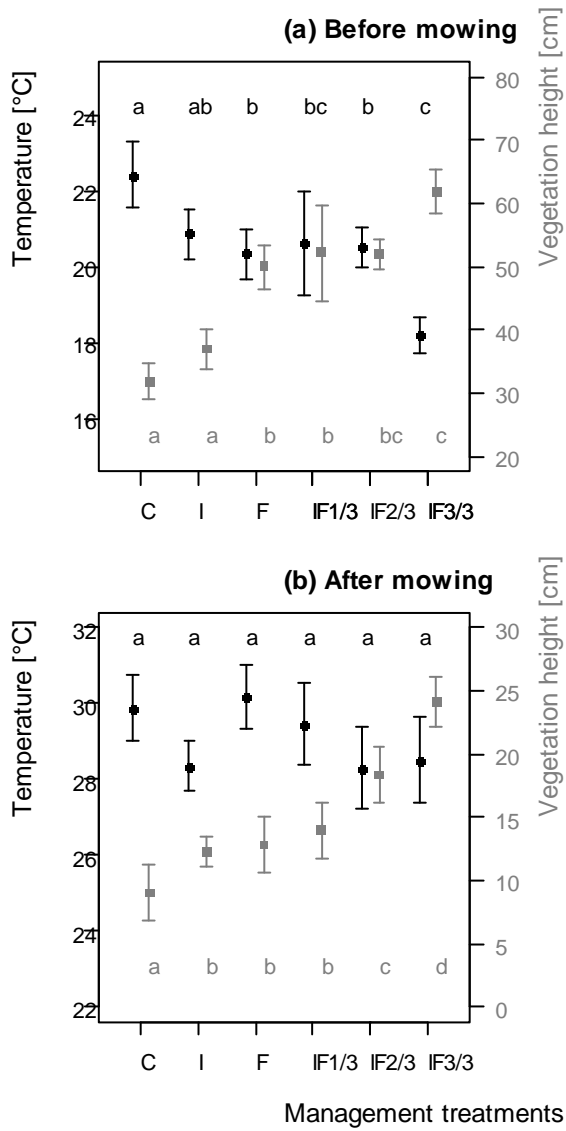

633



634 **Fig. 4**

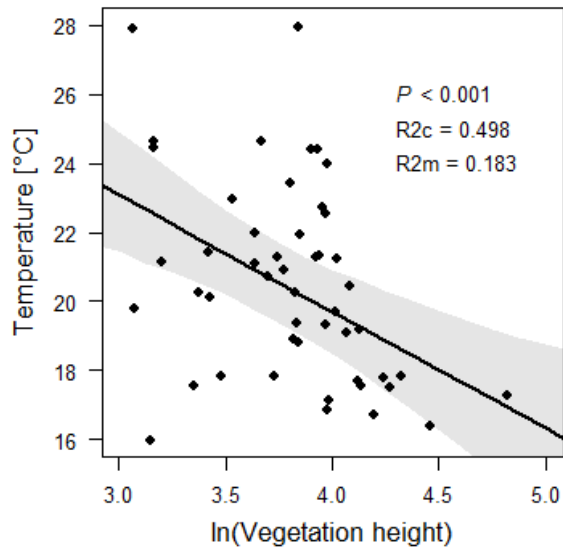

635

636 **Fig. 5**

637 **(a) Caelifera density before mowing**

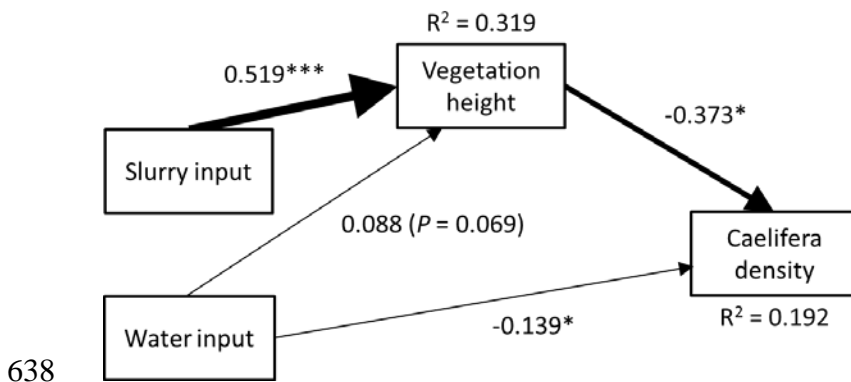

639

640 **(b) Caelifera density after mowing**

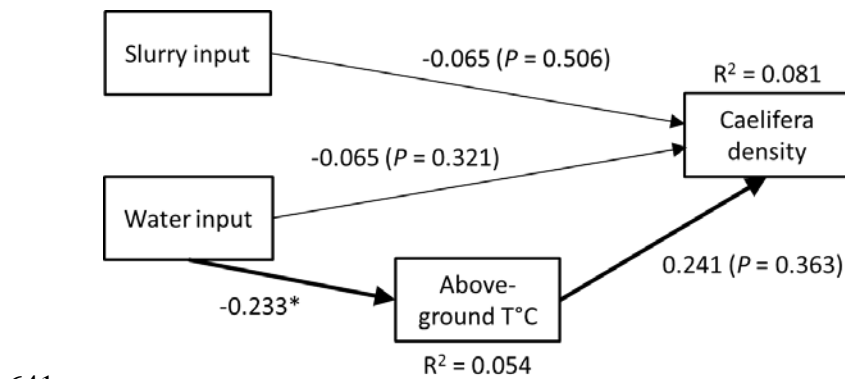

641

642

643 **(c) Caelifera species richness**

644

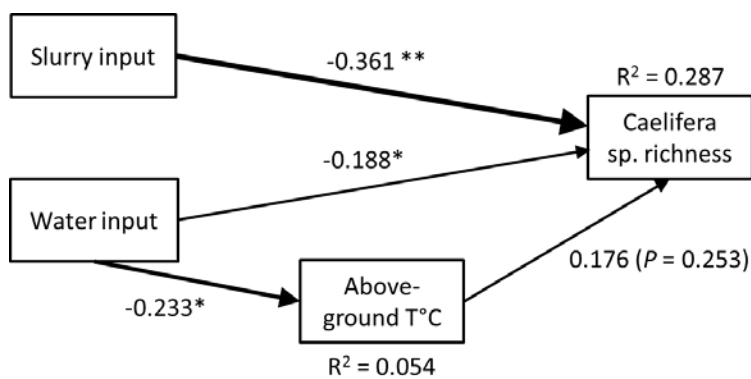

645

646

647 **Appendices**

648 **Appendix 1:** Location of all study sites and indication on the number of orthopterans of each  
649 species caught during the two sampling sessions.

650 **Appendix 2:** Initial full structural equation model used to build all candidate models.

651 **Appendix 3:** Results of the GLMMs carried out on the effects of fertilisation and irrigation on  
652 Caelifera and Ensifera densities.

653 **Appendix 4:** Results of the LMMs carried out on the effects of fertilisation and irrigation on  
654 Caelifera and Ensifera species richness.

655 **Appendix 5:** Results of the LMMs carried out on the effects of fertilisation and irrigation on  
656 vegetation height.

657 **Appendix 6:** Results of the LMMs carried out on the effects of fertilisation and irrigation on  
658 aboveground diurnal temperature.

659

**Appendix 1.** Location name of all study sites (n = 12), geographic coordinates (WGS84), elevation, sampling date, and number of orthopterans of each species caught during the two sampling sessions (i.e. before and after mowing). In addition, meadows were classified in three groups according to the maximum hay productivity potential of the site (see Material and Methods section for more details). Data are missing for the first session in Cordona due to technical problems.

**See Supplemental File.**

**Appendix 2.** Structural equation modelling (SEM) were used to determine if fertilisation and irrigation influence orthopterans directly or/and indirectly through changes in vegetation height or aboveground temperature. The chart represents the full structural equation model including all potential paths. However, the number of paths of the candidate models was set to maximum four and they always included slurry and water inputs which led to a total of twenty candidate models. SEMs were ran on Caelifera densities before and after mowing and on Caelifera species richness (pooled sampling session).

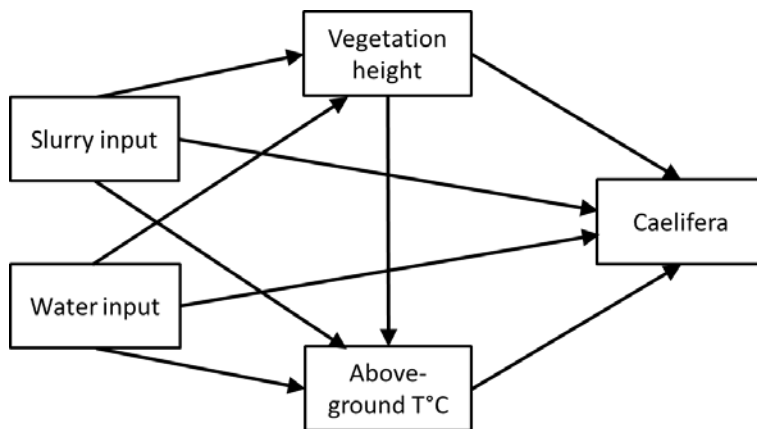

**Appendix 3.** Results of the GLMMs carried out on the effects of fertilisation and irrigation on Caelifera and Ensifera densities for both sampling sessions (i.e. before and after mowing).

Table refers to figure 1 in the article. The fixed factors were the experimental treatments (C = control plots; F = fertilised; I = irrigated; I+F 1/3 = irrigation and fertilisation at low dose; I+F 2/3 = irrigation and fertilisation at medium dose; I+F 3/3 = irrigation and fertilisation at high dose). The random factors were the study sites. Parameter estimates (differences between expected mean abundances on the log scale) are given for paired regime comparisons and significant differences are highlighted in bold.

| Response variable and comparison                       | Estimate | SE    | <i>P</i> (> z )  |
|--------------------------------------------------------|----------|-------|------------------|
| <b>(a) Caelifera density before mowing (log scale)</b> |          |       |                  |
| I vs C                                                 | -0.393   | 0.164 | <b>0.016</b>     |
| F vs C                                                 | -0.568   | 0.173 | <b>0.001</b>     |
| I+F 1/3 vs C                                           | -1.242   | 0.220 | <b>&lt;0.001</b> |
| I+F 2/3 vs C                                           | -1.426   | 0.236 | <b>&lt;0.001</b> |
| I+F 3/3 vs C                                           | -1.315   | 0.226 | <b>&lt;0.001</b> |
| F vs I                                                 | -0.174   | 0.187 | 0.352            |
| I+F 1/3 vs I                                           | -0.849   | 0.231 | <b>&lt;0.001</b> |
| I+F 2/3 vs I                                           | -1.033   | 0.247 | <b>&lt;0.001</b> |
| I+F 3/3 vs I                                           | -0.921   | 0.237 | <b>&lt;0.001</b> |
| I+F 1/3 vs F                                           | -0.674   | 0.238 | <b>0.005</b>     |
| I+F 2/3 vs F                                           | -0.859   | 0.253 | <b>0.001</b>     |
| I+F 3/3 vs F                                           | -0.747   | 0.243 | <b>0.002</b>     |
| I+F 2/3 vs I+F 1/3                                     | -0.184   | 0.287 | 0.521            |
| I+F 3/3 vs I+F 1/3                                     | -0.073   | 0.279 | 0.794            |
| I+F 3/3 vs I+F 2/3                                     | 0.112    | 0.292 | 0.702            |
| <b>(b) Caelifera density after mowing (log scale)</b>  |          |       |                  |
| I vs C                                                 | -0.081   | 0.172 | 0.637            |
| F vs C                                                 | 0.018    | 0.168 | 0.917            |
| I+F 1/3 vs C                                           | -0.083   | 0.172 | 0.629            |
| I+F 2/3 vs C                                           | -0.230   | 0.179 | 0.199            |
| I+F 3/3 vs C                                           | -0.011   | 0.169 | 0.950            |
| F vs I                                                 | 0.099    | 0.171 | 0.564            |
| I+F 1/3 vs I                                           | -0.002   | 0.175 | 0.991            |
| I+F 2/3 vs I                                           | -0.149   | 0.182 | 0.414            |
| I+F 3/3 vs I                                           | 0.070    | 0.172 | 0.683            |
| I+F 1/3 vs F                                           | -0.101   | 0.171 | 0.557            |
| I+F 2/3 vs F                                           | -0.247   | 0.178 | 0.165            |
| I+F 3/3 vs F                                           | -0.028   | 0.168 | 0.867            |
| I+F 2/3 vs I+F 1/3                                     | -0.147   | 0.182 | 0.420            |
| I+F 3/3 vs I+F 1/3                                     | 0.072    | 0.172 | 0.675            |
| I+F 3/3 vs I+F 2/3                                     | 0.219    | 0.179 | 0.222            |

Table continued on next page.

Continued from previous page.

| Response variable and comparison                      | Estimate | SE    | <i>P</i> (> z ) |
|-------------------------------------------------------|----------|-------|-----------------|
| <b>(c) Ensifera density before mowing (log scale)</b> |          |       |                 |
| I vs C                                                | 0.188    | 0.502 | 0.708           |
| F vs C                                                | 0.358    | 0.484 | 0.459           |
| I+F 1/3 vs C                                          | -0.210   | 0.555 | 0.705           |
| I+F 2/3 vs C                                          | -0.148   | 0.546 | 0.786           |
| I+F 3/3 vs C                                          | -0.372   | 0.581 | 0.523           |
| F vs I                                                | 0.170    | 0.459 | 0.711           |
| I+F 1/3 vs I                                          | -0.398   | 0.533 | 0.455           |
| I+F 2/3 vs I                                          | -0.337   | 0.524 | 0.521           |
| I+F 3/3 vs I                                          | -0.560   | 0.561 | 0.318           |
| I+F 1/3 vs F                                          | -0.569   | 0.516 | 0.271           |
| I+F 2/3 vs F                                          | -0.507   | 0.506 | 0.317           |
| I+F 3/3 vs F                                          | -0.730   | 0.544 | 0.180           |
| I+F 2/3 vs I+F 1/3                                    | 0.062    | 0.575 | 0.914           |
| I+F 3/3 vs I+F 1/3                                    | -0.161   | 0.608 | 0.791           |
| I+F 3/3 vs I+F 2/3                                    | -0.223   | 0.600 | 0.710           |
| <b>(d) Ensifera density after mowing (log scale)</b>  |          |       |                 |
| I vs C                                                | -0.167   | 1.159 | 0.885           |
| F vs C                                                | 0.143    | 1.072 | 0.894           |
| I+F 1/3 vs C                                          | 0.571    | 0.981 | 0.561           |
| I+F 2/3 vs C                                          | 0.731    | 0.955 | 0.444           |
| I+F 3/3 vs C                                          | 1.019    | 0.915 | 0.266           |
| F vs I                                                | 0.310    | 1.123 | 0.782           |
| I+F 1/3 vs I                                          | 0.738    | 1.037 | 0.477           |
| I+F 2/3 vs I                                          | 0.898    | 1.012 | 0.375           |
| I+F 3/3 vs I                                          | 1.186    | 0.974 | 0.224           |
| I+F 1/3 vs F                                          | 0.427    | 0.939 | 0.649           |
| I+F 2/3 vs F                                          | 0.588    | 0.911 | 0.519           |
| I+F 3/3 vs F                                          | 0.876    | 0.869 | 0.314           |
| I+F 2/3 vs I+F 1/3                                    | 0.160    | 0.803 | 0.842           |
| I+F 3/3 vs I+F 1/3                                    | 0.448    | 0.755 | 0.553           |
| I+F 3/3 vs I+F 2/3                                    | 0.288    | 0.720 | 0.690           |

**Appendix 4.** Results of the LMMs carried out on the effects of fertilisation and irrigation on Caelifera and Ensifera species richness. Table refers to figure 2 in the article. Both sampling sessions were analysed together. The fixed factors were the experimental treatments (C = control plots; F = fertilised; I = irrigated; I+F 1/3 = irrigation and fertilisation at low dose; I+F 2/3 = irrigation and fertilisation at medium dose; I+F 3/3 = irrigation and fertilisation at high dose). The random factors were the study sites. Parameter estimates (differences between expected mean species richness) are given for paired regime comparisons and significant differences are highlighted in bold.

| Response variable and comparison      | Estimate | SE    | <i>P</i> (> t )  |
|---------------------------------------|----------|-------|------------------|
| <b>(a) Caelifera species richness</b> |          |       |                  |
| I vs C                                | -0.333   | 0.358 | 0.355            |
| F vs C                                | -0.417   | 0.358 | 0.249            |
| I+F 1/3 vs C                          | -1.417   | 0.358 | <b>&lt;0.001</b> |
| I+F 2/3 vs C                          | -1.083   | 0.358 | <b>0.004</b>     |
| I+F 3/3 vs C                          | -2.250   | 0.358 | <b>&lt;0.001</b> |
| F vs I                                | -0.083   | 0.357 | 0.817            |
| I+F 1/3 vs I                          | -1.083   | 0.357 | <b>0.004</b>     |
| I+F 2/3 vs I                          | -0.750   | 0.357 | <b>0.041</b>     |
| I+F 3/3 vs I                          | -1.917   | 0.357 | <b>&lt;0.001</b> |
| I+F 1/3 vs F                          | -1.000   | 0.357 | <b>0.007</b>     |
| I+F 2/3 vs F                          | -0.667   | 0.357 | 0.068            |
| I+F 3/3 vs F                          | -1.833   | 0.357 | <b>&lt;0.001</b> |
| I+F 2/3 vs I+F 1/3                    | 0.333    | 0.358 | 0.355            |
| I+F 3/3 vs I+F 1/3                    | -0.833   | 0.358 | <b>0.023</b>     |
| I+F 3/3 vs I+F 2/3                    | -1.167   | 0.358 | <b>0.002</b>     |
| <b>(b) Ensifera species richness</b>  |          |       |                  |
| I vs C                                | -0.083   | 0.332 | 0.803            |
| F vs C                                | 0.167    | 0.332 | 0.618            |
| I+F 1/3 vs C                          | 0.417    | 0.332 | 0.215            |
| I+F 2/3 vs C                          | 0.250    | 0.332 | 0.455            |
| I+F 3/3 vs C                          | 0.417    | 0.332 | 0.215            |
| F vs I                                | 0.250    | 0.332 | 0.455            |
| I+F 1/3 vs I                          | 0.500    | 0.332 | 0.138            |
| I+F 2/3 vs I                          | 0.333    | 0.332 | 0.320            |
| I+F 3/3 vs I                          | 0.500    | 0.332 | 0.138            |
| I+F 1/3 vs F                          | 0.250    | 0.332 | 0.455            |
| I+F 2/3 vs F                          | 0.083    | 0.332 | 0.803            |
| I+F 3/3 vs F                          | 0.250    | 0.332 | 0.455            |
| I+F 2/3 vs I+F 1/3                    | -0.167   | 0.332 | 0.618            |
| I+F 3/3 vs I+F 1/3                    | 0.000    | 0.332 | 1.000            |
| I+F 3/3 vs I+F 2/3                    | 0.167    | 0.332 | 0.618            |



**Appendix 5.** Results of the LMMs carried out on the effects of fertilisation and irrigation on average vegetation height for both sampling sessions (i.e. before and after mowing). Table refers to figure 3 in the article. The fixed factors were the experimental treatments (C = control plots; F = fertilised; I = irrigated; I+F 1/3 = irrigation and fertilisation at low dose; I+F 2/3 = irrigation and fertilisation medium at dose; I+F 3/3 = irrigation and fertilisation at high dose). The random factors were the study sites. Parameter estimates (differences between expected mean) are given for paired regime comparisons and significant differences are highlighted in bold.

| Response variable and comparison | Estimate | SE    | <i>P</i> (>  <i>t</i>  ) |
|----------------------------------|----------|-------|--------------------------|
| <b>(a) Before mowing</b>         |          |       |                          |
| I vs C                           | 0.154    | 0.094 | 0.106                    |
| F vs C                           | 0.468    | 0.094 | <b>&lt;0.001</b>         |
| I+F 1/3 vs C                     | 0.454    | 0.094 | <b>&lt;0.001</b>         |
| I+F 2/3 vs C                     | 0.520    | 0.094 | <b>&lt;0.001</b>         |
| I+F 3/3 vs C                     | 0.687    | 0.094 | <b>&lt;0.001</b>         |
| F vs I                           | 0.314    | 0.094 | <b>0.002</b>             |
| I+F 1/3 vs I                     | 0.300    | 0.094 | <b>0.002</b>             |
| I+F 2/3 vs I                     | 0.366    | 0.094 | <b>&lt;0.001</b>         |
| I+F 3/3 vs I                     | 0.533    | 0.094 | <b>&lt;0.001</b>         |
| I+F 1/3 vs F                     | -0.014   | 0.094 | 0.881                    |
| I+F 2/3 vs F                     | 0.052    | 0.094 | 0.580                    |
| I+F 3/3 vs F                     | 0.219    | 0.094 | <b>0.023</b>             |
| I+F 2/3 vs I+F 1/3               | 0.066    | 0.094 | 0.482                    |
| I+F 3/3 vs I+F 1/3               | 0.233    | 0.094 | <b>0.016</b>             |
| I+F 3/3 vs I+F 2/3               | 0.167    | 0.094 | 0.080                    |
| <b>(b) After mowing</b>          |          |       |                          |
| I vs C                           | 0.479    | 0.107 | <b>&lt;0.001</b>         |
| F vs C                           | 0.421    | 0.107 | <b>&lt;0.001</b>         |
| I+F 1/3 vs C                     | 0.520    | 0.107 | <b>&lt;0.001</b>         |
| I+F 2/3 vs C                     | 0.864    | 0.107 | <b>&lt;0.001</b>         |
| I+F 3/3 vs C                     | 1.171    | 0.107 | <b>&lt;0.001</b>         |
| F vs I                           | -0.058   | 0.107 | 0.592                    |
| I+F 1/3 vs I                     | 0.041    | 0.107 | 0.706                    |
| I+F 2/3 vs I                     | 0.385    | 0.107 | <b>0.001</b>             |
| I+F 3/3 vs I                     | 0.692    | 0.107 | <b>&lt;0.001</b>         |
| I+F 1/3 vs F                     | 0.099    | 0.107 | 0.362                    |
| I+F 2/3 vs F                     | 0.443    | 0.107 | <b>&lt;0.001</b>         |
| I+F 3/3 vs F                     | 0.750    | 0.107 | <b>&lt;0.001</b>         |
| I+F 2/3 vs I+F 1/3               | 0.344    | 0.107 | <b>0.002</b>             |
| I+F 3/3 vs I+F 1/3               | 0.652    | 0.107 | <b>&lt;0.001</b>         |
| I+F 3/3 vs I+F 2/3               | 0.307    | 0.107 | <b>0.006</b>             |

**Appendix 6.** Results of the LMMs carried out on the effects of fertilisation and irrigation on aboveground diurnal temperature for both sampling sessions (i.e. before and after mowing).

Table refers to figure 3 in the article. The fixed factors were the experimental treatments (C = control plots; F = fertilised; I = irrigated; I+F 1/3 = irrigation and fertilisation at low dose; I+F 2/3 = irrigation and fertilisation medium at dose; I+F 3/3 = irrigation and fertilisation at high dose). The random factors were the study sites. Parameter estimates (differences between expected mean) are given for paired regime comparisons and significant differences are highlighted in bold.

| Response variable and comparison | Estimate | SE    | <i>P</i> (> t )  |
|----------------------------------|----------|-------|------------------|
| <b>(a) Before mowing</b>         |          |       |                  |
| I vs C                           | -1.300   | 0.850 | 0.134            |
| F vs C                           | -2.111   | 0.920 | <b>0.027</b>     |
| I+F 1/3 vs C                     | -2.305   | 1.098 | <b>0.042</b>     |
| I+F 2/3 vs C                     | -2.099   | 0.876 | <b>0.021</b>     |
| I+F 3/3 vs C                     | -4.317   | 0.866 | <b>&lt;0.001</b> |
| F vs I                           | -0.810   | 0.914 | 0.381            |
| I+F 1/3 vs I                     | -1.005   | 1.081 | 0.358            |
| I+F 2/3 vs I                     | -0.799   | 0.849 | 0.353            |
| I+F 3/3 vs I                     | -3.017   | 0.849 | <b>0.001</b>     |
| I+F 1/3 vs F                     | -0.195   | 1.133 | 0.865            |
| I+F 2/3 vs F                     | 0.012    | 0.929 | 0.990            |
| I+F 3/3 vs F                     | -2.207   | 0.930 | <b>0.023</b>     |
| I+F 2/3 vs I+F 1/3               | 0.206    | 1.094 | 0.851            |
| I+F 3/3 vs I+F 1/3               | -2.012   | 1.099 | 0.075            |
| I+F 3/3 vs I+F 2/3               | -2.218   | 0.875 | <b>0.015</b>     |
| <b>(b) After mowing</b>          |          |       |                  |
| I vs C                           | -1.612   | 0.949 | 0.097            |
| F vs C                           | 0.181    | 0.949 | 0.850            |
| I+F 1/3 vs C                     | -0.503   | 0.949 | 0.599            |
| I+F 2/3 vs C                     | -1.636   | 0.948 | 0.092            |
| I+F 3/3 vs C                     | -1.228   | 1.028 | 0.240            |
| F vs I                           | 1.793    | 0.979 | 0.075            |
| I+F 1/3 vs I                     | 1.109    | 0.968 | 0.259            |
| I+F 2/3 vs I                     | -0.024   | 0.978 | 0.981            |
| I+F 3/3 vs I                     | 0.385    | 1.060 | 0.719            |
| I+F 1/3 vs F                     | -0.684   | 0.979 | 0.489            |
| I+F 2/3 vs F                     | -1.817   | 0.978 | 0.071            |
| I+F 3/3 vs F                     | -1.408   | 1.046 | 0.186            |
| I+F 2/3 vs I+F 1/3               | -1.133   | 0.978 | 0.254            |
| I+F 3/3 vs I+F 1/3               | -0.724   | 1.060 | 0.499            |
| I+F 3/3 vs I+F 2/3               | 0.409    | 1.058 | 0.702            |
